# Supplementary material for: Estimating time of HIV-1 infection from next-generation sequence diversity
Source: PubMed Central journal article supplement (PMC5638550; doi:10.1371/journal.pcbi.1005775), 2017-10-02

**Fig S4. Coefficient of determination for average pairwise distance (diversity), by codon position. (Genetic region: *pol*.)**

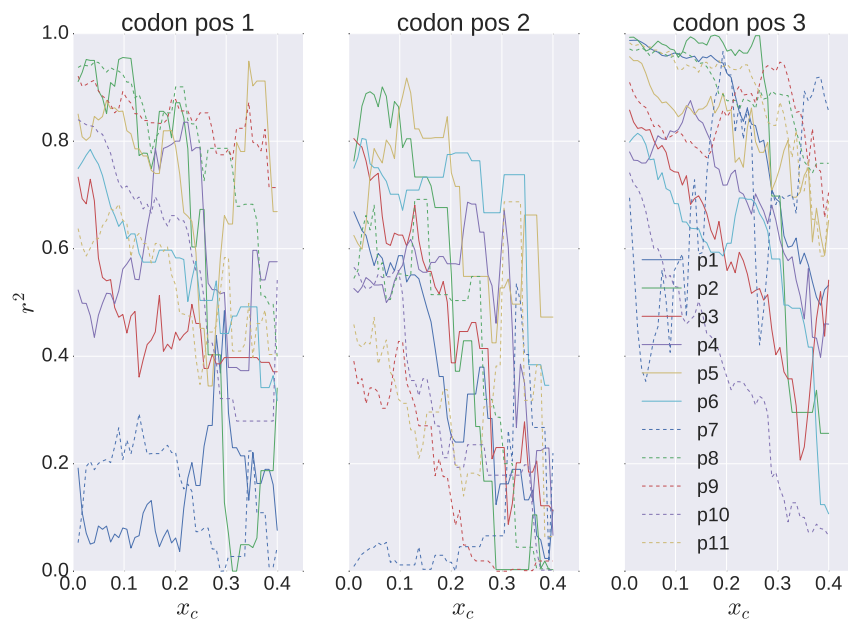

Supplement: pcbi.1005775.s004.pdf [file pcbi.1005775.s004.pdf]
