# Supplementary material for: Estimating time of HIV-1 infection from next-generation sequence diversity
Source: PubMed Central journal article supplement (PMC5638550; doi:10.1371/journal.pcbi.1005775), 2017-10-02

**Fig S6. Distribution of slopes ( $s$ ) and intercepts ( $t_0$ ) (bootstrapped over the patients of the training dataset).** (Genetic region: 3rd codon positions in *pol*, diversity measure: average pairwise distance,  $x_c = 0.003$ .)

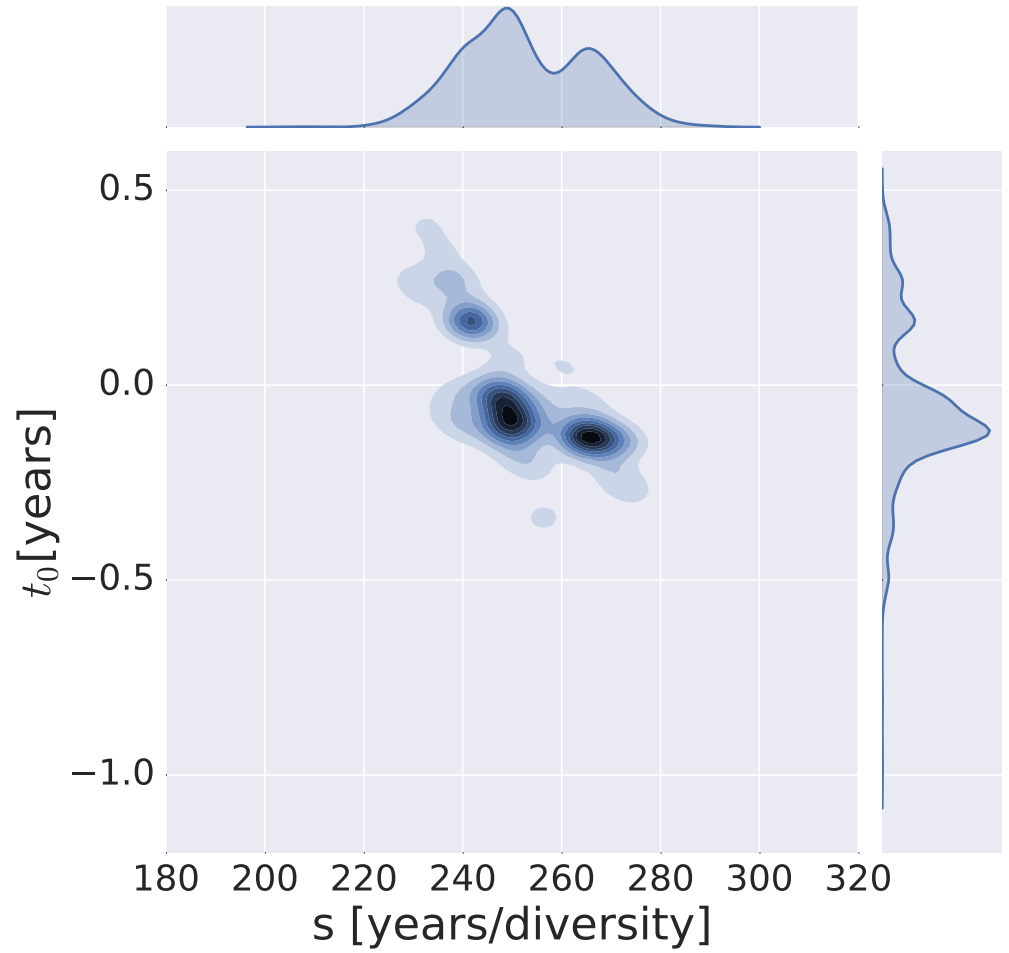

Supplement: pcbi.1005775.s006.pdf [file pcbi.1005775.s006.pdf]
