# Supplementary material for: Estimating time of HIV-1 infection from next-generation sequence diversity
Source: PubMed Central journal article supplement (PMC5638550; doi:10.1371/journal.pcbi.1005775), 2017-10-02

**Fig S7. Dependence of the slope and intercept in the cutoff.** (Genetic region: 3rd codon positions in *pol*, diversity measure: average pairwise distance.)

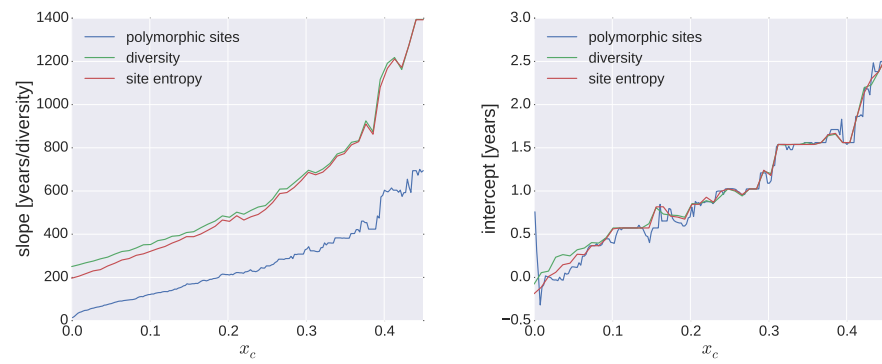

Supplement: pcbi.1005775.s007.pdf [file pcbi.1005775.s007.pdf]
