# Supplementary material for: Estimating time of HIV-1 infection from next-generation sequence diversity
Source: PubMed Central journal article supplement (PMC5638550; doi:10.1371/journal.pcbi.1005775), 2017-10-02
Supplement: pcbi.1005775.s019.pdf [file pcbi.1005775.s019.pdf]

**S5 Table Recommended slope and intercept values depending on the cutoff.**

| cutoff ( $x_c$ ) | slope and intercept        |                                  |                  | slope only                 |                  |
|------------------|----------------------------|----------------------------------|------------------|----------------------------|------------------|
|                  | slope ( $s$ ) <sup>a</sup> | intercept ( $t_0$ ) <sup>b</sup> | MAE <sup>b</sup> | slope ( $s$ ) <sup>a</sup> | MAE <sup>b</sup> |
| 0.00             | 445.61                     | -0.75                            | 0.91             | 390.96                     | 0.93             |
| 0.05             | 595.29                     | -0.12                            | 0.97             | 582.31                     | 0.95             |
| 0.10             | 745.57                     | 0.07                             | 0.89             | 755.98                     | 0.88             |
| 0.15             | 909.35                     | 0.19                             | 0.99             | 944.97                     | 1.00             |
| 0.20             | 1089.94                    | 0.29                             | 1.09             | 1160.02                    | 1.10             |
| 0.25             | 1236.10                    | 0.57                             | 1.20             | 1370.86                    | 1.24             |
| 0.30             | 1511.44                    | 0.79                             | 1.29             | 1772.83                    | 1.35             |
| 0.35             | 1941.61                    | 0.89                             | 1.42             | 2456.16                    | 1.44             |
| 0.40             | 2405.31                    | 1.35                             | 1.66             | 3229.49                    | 1.74             |
| 0.45             | 3062.32                    | 2.28                             | 1.84             | 5200.83                    | 2.26             |

Genetic region: all sites in *pol*, diversity measure: average site entropy. <sup>a</sup>in years/diversity; <sup>b</sup>in years.
